# Supplementary material
Source: MDPI journal article supplement (https://www.mdpi.com/2071-1050/10/5/1601)

## Supplementary Information D: Detailed Social Life Cycle Impact Assessment Results

STAKEHOLDER: WORKERS

Freedom of association and collective bargaining rights

**TABLE S36. LIFE CYCLE IMPACT ASSESSMENT RESULTS WITH RESPECT TO "FREEDOM OF ASSOCIATION AND COLLECTIVE BARGAINING RIGHTS" FOR WORKERS IN CANADIAN LAYER EGG FACILITIES IN 2012.**

| <b>Freedom of Association and Collective Bargaining Rights</b>                                     |                                                                                      |                                                                                      |                                                                                      |                                                                                      |
|----------------------------------------------------------------------------------------------------|--------------------------------------------------------------------------------------|--------------------------------------------------------------------------------------|--------------------------------------------------------------------------------------|--------------------------------------------------------------------------------------|
| No restrictions on the right of employees to collective bargaining                                 |   |   |   |   |
| Actual degree of union representation                                                              |   |   |   |   |
| Employee participation in planning of changes in organization which will affect working conditions |   |   |   |   |
| Codified minimum notice period(s) regarding significant operational changes                        |   |   |   |   |
| Employee access to a neutral, binding, and independent dispute resolution procedure                |  |  |  |  |

  

**Legend**

|                                                                                     |                                                                                     |                                                                                     |                                                                                     |                                                                                     |
|-------------------------------------------------------------------------------------|-------------------------------------------------------------------------------------|-------------------------------------------------------------------------------------|-------------------------------------------------------------------------------------|-------------------------------------------------------------------------------------|
| Not Assessed                                                                        | Risky                                                                               | Compliant                                                                           | Proactive                                                                           | Committed                                                                           |
|  |  |  |  |  |

## Fair Salary

**TABLE S37. LIFE CYCLE IMPACT ASSESSMENT RESULTS WITH RESPECT TO "FAIR SALARY" FOR WORKERS IN CANADIAN LAYER EGG FACILITIES IN 2012.**

| <b>Fair Salary</b>                                                                                                                                                                                                                                                                                                                                                                                                                                                                                                   |                                                                                   |                                                                                   |                                                                                   |                                                                                   |
|----------------------------------------------------------------------------------------------------------------------------------------------------------------------------------------------------------------------------------------------------------------------------------------------------------------------------------------------------------------------------------------------------------------------------------------------------------------------------------------------------------------------|-----------------------------------------------------------------------------------|-----------------------------------------------------------------------------------|-----------------------------------------------------------------------------------|-----------------------------------------------------------------------------------|
| Hourly wage of <b>lowest paid</b> employees                                                                                                                                                                                                                                                                                                                                                                                                                                                                          |                                                                                   |                                                                                   |                                                                                   |                                                                                   |
| relative to legislated minimum wage                                                                                                                                                                                                                                                                                                                                                                                                                                                                                  |  |  |  |  |
|                                                                                                                                                                                                                                                                                                                                                                                                                                                                                                                      |                                                                                   |                                                                                   |                                                                                   |                                                                                   |
| relative to average for Canadian ag workers                                                                                                                                                                                                                                                                                                                                                                                                                                                                          |  |  |  |  |
| Hourly wage of <b>average</b> employees                                                                                                                                                                                                                                                                                                                                                                                                                                                                              |                                                                                   |                                                                                   |                                                                                   |                                                                                   |
| relative to legislated minimum wage                                                                                                                                                                                                                                                                                                                                                                                                                                                                                  |  |  |  |  |
|                                                                                                                                                                                                                                                                                                                                                                                                                                                                                                                      |                                                                                   |                                                                                   |                                                                                   |                                                                                   |
| relative to average for Canadian ag workers                                                                                                                                                                                                                                                                                                                                                                                                                                                                          |  |  |  |  |
| Regularity and documentation of pay                                                                                                                                                                                                                                                                                                                                                                                                                                                                                  |  |  |  |  |
| Complaints regarding wage deductions                                                                                                                                                                                                                                                                                                                                                                                                                                                                                 |  |  |  |  |
| <b>Legend</b><br>Not Assessed    Risky    Compliant    Proactive    Committed<br>     |                                                                                   |                                                                                   |                                                                                   |                                                                                   |

## Working Hours

**TABLE S38. LIFE CYCLE IMPACT ASSESSMENT RESULTS REGARDING "WORKING HOURS" FOR WORKERS IN CANADIAN LAYER EGG FACILITIES IN 2012.**

| <b>Working Hours</b>                                                          |                                                                             |
|-------------------------------------------------------------------------------|-----------------------------------------------------------------------------|
| Average work week for employees                                               | <div> <div> <div></div> <div></div> <div></div> <div>X</div> </div> </div>  |
| Longest average work week for any employee                                    | <div> <div> <div></div> <div></div> <div>X</div> <div>X</div> </div> </div> |
| % employees working more than 48 hours per week                               | <div> <div> <div></div> <div></div> <div>X</div> <div>X</div> </div> </div> |
| Contractual agreement on working hours, conditions, and overtime compensation | <div> <div> <div></div> <div></div> <div>X</div> <div>X</div> </div> </div> |
| Compensation for overtime hours                                               | <div> <div> <div>X</div> <div></div> <div></div> <div></div> </div> </div>  |
| Agricultural sector norm                                                      |                                                                             |
| Canadian norm                                                                 | <div> <div> <div></div> <div></div> <div></div> <div>X</div> </div> </div>  |

### Legend

| Not Assessed | Risky | Compliant | Proactive | Committed |
|--------------|-------|-----------|-----------|-----------|
| X            |       |           |           |           |

## Equal Opportunities

**TABLE S39. LIFE CYCLE IMPACT ASSESSMENT RESULTS WITH RESPECT TO "EQUAL OPPORTUNITIES" FOR WORKERS IN CANADIAN LAYER EGG FACILITIES IN 2012.**

| <b>Equal Opportunities</b>                     |   |  |   |   |
|------------------------------------------------|---|--|---|---|
| Existence of formal equal opportunities policy | X |  |   |   |
| Gender balance                                 |   |  |   | X |
| Visible minority representation                |   |  |   | X |
| Females in management positions                |   |  |   | X |
| Visible minorities in management positions     |   |  |   | X |
| Complaints of discrimination or harassment     |   |  | X | X |
| Basic salary ratio of female to male employees |   |  | X | X |
| Basic salary ratio of female to male managers  |   |  | X | X |

  

**Legend**

|              |       |           |           |           |
|--------------|-------|-----------|-----------|-----------|
| Not Assessed | Risky | Compliant | Proactive | Committed |
| X            |       |           |           |           |

Health and Safety

TABLE S40. LIFE CYCLE INVENTORY DATA REGARDING "HEALTH AND SAFETY" FOR WORKERS IN CANADIAN LAYER EGG FACILITIES IN 2012.

| Health and Safety                                                                      |  |  |  |  |
|----------------------------------------------------------------------------------------|--|--|--|--|
| Medically-diagnosed, work-related diseases and fatalities                              |  |  |  |  |
| Dedicated Health and Safety Plan and manager                                           |  |  |  |  |
| Workplace characterized by high levels of noise, fumes, dust, heat, or other irritants |  |  |  |  |
| Training in handling hazardous materials                                               |  |  |  |  |
| Provision of protective gear                                                           |  |  |  |  |
| First aid equipment available                                                          |  |  |  |  |
| First aid attendant available                                                          |  |  |  |  |
| Access to clean water and sanitary facilities                                          |  |  |  |  |

Legend

|              |       |           |           |           |
|--------------|-------|-----------|-----------|-----------|
| Not Assessed | Risky | Compliant | Proactive | Committed |
|              |       |           |           |           |

## Social Benefits, Social Security, and Job Security

**TABLE S41. LIFE CYCLE IMPACT ASSESSMENT RESULTS WITH RESPECT TO "SOCIAL BENEFITS, SOCIAL SECURITY, AND JOB SECURITY" FOR WORKERS IN CANADIAN LAYER EGG FACILITIES IN 2012.**

| <b>Social Benefits, Social Security, and Job Security</b> |       |           |           |           |
|-----------------------------------------------------------|-------|-----------|-----------|-----------|
| Provision of social benefits                              |       |           |           |           |
| at least one non-mandatory social benefit                 | X     |           |           |           |
|                                                           |       |           |           |           |
| at least non-mandatory three social benefits              | X     |           |           |           |
|                                                           |       |           |           |           |
| Job security (employment contracts)                       |       |           | X         | X         |
|                                                           |       |           |           |           |
| Employee turn-over                                        |       |           | X         | X         |
|                                                           |       |           |           |           |
| <b>Legend</b>                                             |       |           |           |           |
| Not Assessed                                              | Risky | Compliant | Proactive | Committed |
| X                                                         |       |           |           |           |

## STAKEHOLDER: LOCAL COMMUNITY

### Access to Resources

**TABLE S42. LIFE CYCLE IMPACT ASSESSMENT RESULTS REGARDING "ACCESS TO RESOURCES" FOR LOCAL COMMUNITIES HOSTING CANADIAN LAYER EGG FACILITIES IN 2012.**

| Access to Resource                                                                     |                                                                |
|----------------------------------------------------------------------------------------|----------------------------------------------------------------|
| Expenditures on infrastructure with mutual community access and benefit                | <div> <div>X</div> <div></div> <div></div> <div>X</div> </div> |
| Expenditures on voluntary, charitable donations and investments in the local community | <div> <div>X</div> <div></div> <div></div> <div>X</div> </div> |

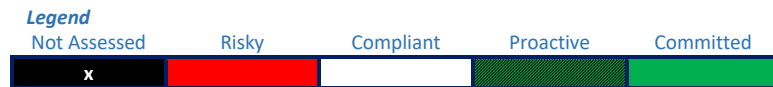

### Safe and Healthy Living Conditions

**TABLE S43. LIFE CYCLE IMPACT ASSESSMENT RESULTS REGARDING "SAFE AND HEALTHY LIVING CONDITIONS" FOR LOCAL COMMUNITIES HOSTING CANADIAN LAYER EGG FACILITIES IN 2012.**

| Safe and Healthy Living Conditions                          |                                                                |
|-------------------------------------------------------------|----------------------------------------------------------------|
| Accident rate                                               | <div> <div></div> <div></div> <div>X</div> <div>X</div> </div> |
| Complaints regarding nuisance issues                        | <div> <div></div> <div></div> <div>X</div> <div>X</div> </div> |
| Fines for nuisance issues                                   | <div> <div></div> <div></div> <div>X</div> <div>X</div> </div> |
| Formal protocols to mitigate risk and respond to grievances | <div> <div>X</div> <div></div> <div></div> <div></div> </div>  |
| Environmental farm management plan                          | <div> <div>X</div> <div></div> <div></div> <div></div> </div>  |

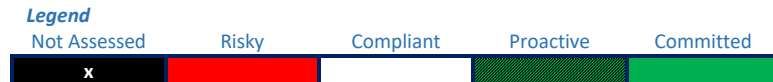

## Respect for Indigenous Rights

**TABLE S44. LIFE CYCLE IMPACT ASSESSMENT RESULTS REGARDING "RESPECT FOR INDIGENOUS RIGHTS" FOR CANADIAN LAYER EGG FACILITIES IN 2012.**

| <b>Respect for Indigenous Rights</b>                                            | ↓                                                                                        |
|---------------------------------------------------------------------------------|------------------------------------------------------------------------------------------|
| Located in areas where land rights conflict with indigenous groups exist        |       |
| Formal policy to protect the rights of indigenous community members is in place | ↓<br> |
| Meetings were held with indigenous community members                            | ↓<br> |
| Complaints received from indigenous community members                           | ↓<br> |

**Legend**

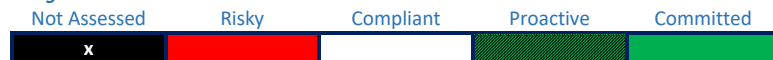

## Community Engagement

**TABLE S45. LIFE CYCLE IMPACT ASSESSMENT RESULTS REGARDING "COMMUNITY ENGAGEMENT" WITH LOCAL COMMUNITIES HOSTING CANADIAN LAYER EGG FACILITIES IN 2012.**

| <b>Community Engagement</b>                        | ↓                                                                                         |
|----------------------------------------------------|-------------------------------------------------------------------------------------------|
| Existence of formal policy on community engagement |       |
| Engagement with community stakeholder groups       | ↓<br> |
| Volunteerism in local community initiatives.       | ↓<br> |

**Legend**

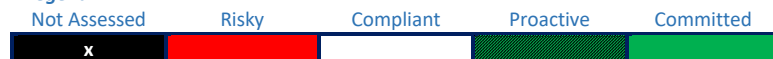



## Local Employment

**TABLE S46. LIFE CYCLE IMPACT ASSESSMENT RESULTS REGARDING "LOCAL EMPLOYMENT" FOR LOCAL COMMUNITIES HOSTING CANADIAN LAYER EGG FACILITIES IN 2012.**

| <b>Local Employment</b>              |   |  |  |  | ↓ |
|--------------------------------------|---|--|--|--|---|
| Local hiring rate                    | X |  |  |  |   |
| Formal policy regarding local hiring | X |  |  |  | ↓ |
| Local sourcing of goods and services | X |  |  |  | ↓ |

  

**Legend**

|              |       |           |           |           |
|--------------|-------|-----------|-----------|-----------|
| Not Assessed | Risky | Compliant | Proactive | Committed |
| X            |       |           |           |           |

## STAKEHOLDER: VALUE CHAIN PARTNERS

### Fair Competition

**TABLE S47. LIFE CYCLE IMPACT ASSESSMENT RESULTS REGARDING "FAIR COMPETITION" FOR THE SUPPLY CHAIN PARTNERS OF CANADIAN LAYER EGG FACILITIES IN 2012.**

| <b>Fair Competition</b>                                                          |   |  |   |   | ↓ |
|----------------------------------------------------------------------------------|---|--|---|---|---|
| Procedures to prevent engaging in/being complicit in anti-competitive behaviours | X |  |   |   |   |
| Legal actions, fines or complaints regarding anti-competitive behaviours         |   |  | X | X | ↓ |

  

**Legend**

|              |       |           |           |           |
|--------------|-------|-----------|-----------|-----------|
| Not Assessed | Risky | Compliant | Proactive | Committed |
| X            |       |           |           |           |

## Promoting Social Responsibility

**TABLE S48. LIFE CYCLE IMPACT ASSESSMENT RESULTS REGARDING "PROMOTING SOCIAL RESPONSIBILITY" FOR THE SUPPLY CHAIN PARTNERS OF CANADIAN LAYER EGG FACILITIES IN 2012.**

| <b>Promoting Social Responsibility</b>                                                   |                                                               |
|------------------------------------------------------------------------------------------|---------------------------------------------------------------|
| Adheres to code of conduct for protection of human rights among suppliers                | <div> <div>X</div> <div></div> <div></div> <div></div> </div> |
| Auditing suppliers with regards to environmental or social responsibility                | <div> <div>X</div> <div></div> <div></div> <div></div> </div> |
| Participation in initiatives to promote supply chain environmental/social responsibility | <div> <div>X</div> <div></div> <div></div> <div></div> </div> |

### Legend

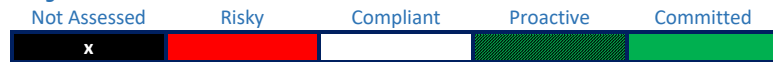

## Supplier Relationships

**TABLE S49. LIFE CYCLE IMPACT ASSESSMENT RESULTS REGARDING "SUPPLIER RELATIONSHIPS" FOR THE SUPPLY CHAIN PARTNERS OF CANADIAN LAYER EGG FACILITIES IN 2012.**

| <b>Supplier Relationships</b>                                    |                                                                |
|------------------------------------------------------------------|----------------------------------------------------------------|
| Complaints from suppliers with respect to coercive communication | <div> <div></div> <div></div> <div>X</div> <div>X</div> </div> |
| Complaints from suppliers with respect to insufficient lead time | <div> <div></div> <div></div> <div>X</div> <div>X</div> </div> |
| Complaints from suppliers with respect to timeliness of payments | <div> <div></div> <div></div> <div>X</div> <div>X</div> </div> |

### Legend

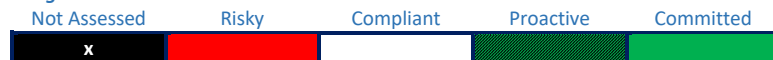

## STAKEHOLDER: SOCIETY

### Public Commitment to Sustainability

**TABLE S50. LIFE CYCLE IMPACT ASSESSMENT RESULTS REGARDING "PUBLIC COMMITMENT TO SUSTAINABILITY" FOR SOCIETY AT LARGE WITH RESPECT TO CANADIAN LAYER EGG FACILITIES IN 2012.**

| <b>Public Commitment to Sustainability</b>                                |                                                                            |
|---------------------------------------------------------------------------|----------------------------------------------------------------------------|
| Publically available CSR documents                                        | <div> <div>X</div> <div></div> <div></div> <div></div> <div></div> </div>  |
| Mechanisms to ensure realization of public sustainability commitments     | <div> <div>X</div> <div></div> <div></div> <div></div> <div></div> </div>  |
| Complaints related to non-fulfillment of promises or agreements           | <div> <div></div> <div></div> <div></div> <div>X</div> <div>X</div> </div> |
| Awards for engagement in social, environmental, or sustainability issues  | <div> <div>X</div> <div></div> <div></div> <div></div> <div></div> </div>  |
| Memberships in programs to support/promote sustainable business practices | <div> <div>X</div> <div></div> <div></div> <div></div> <div></div> </div>  |
| Total hours devoted to sustainability programs                            | <div> <div>X</div> <div></div> <div></div> <div></div> <div></div> </div>  |
| Total expenditures devoted to sustainability programs                     | <div> <div>X</div> <div></div> <div></div> <div></div> <div></div> </div>  |
| Accused of lobbying against sustainability measures                       | <div> <div></div> <div></div> <div></div> <div>X</div> <div>X</div> </div> |

#### Legend

| Not Assessed | Risky | Compliant | Proactive | Committed |
|--------------|-------|-----------|-----------|-----------|
| X            |       |           |           |           |

## Contribution to Economic Development

**TABLE S51. LIFE CYCLE INVENTORY DATA REGARDING "CONTRIBUTION TO ECONOMIC DEVELOPMENT" FOR SOCIETY AT LARGE WITH RESPECT TO CANADIAN LAYER EGG FACILITIES IN 2012.**

| <b>Contribution to Economic Development</b>                          |              |            |              |
|----------------------------------------------------------------------|--------------|------------|--------------|
| Total revenue for layer facility                                     | 2,507,837.95 | 260,000.00 | 9,463,885.00 |
| Total wages paid                                                     | 247,846.73   | 373.00     | 1,055,438.00 |
| Total payments to government (taxes, royalties, permits, fees, etc.) | 78,382.30    | 500.00     | 339,569.00   |
| Total expenses                                                       | 1,758,493.30 | 175,000.00 | 7,226,757.00 |

## Employee Training

**TABLE S52. LIFE CYCLE IMPACT ASSESSMENT RESULTS REGARDING "EMPLOYEE TRAINING" FOR SOCIETY AT LARGE WITH RESPECT TO CANADIAN LAYER EGG FACILITIES IN 2012.**

| <b>Employee Training</b>                    |  |
|---------------------------------------------|--|
| Total hours devoted to employee training    |  |
| Total expenses related to employee training |  |

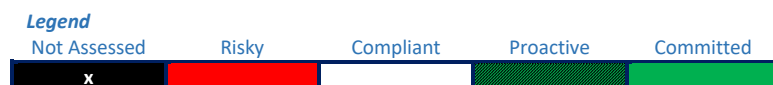

## Corruption

**TABLE S53 LIFE CYCLE IMPACT ASSESSMENT RESULTS REGARDING "CORRUPTION" FOR SOCIETY AT LARGE WITH RESPECT TO CANADIAN LAYER EGG FACILITIES IN 2012.**

| <b>Corruption</b>                                                                        |  |
|------------------------------------------------------------------------------------------|--|
| Convictions for violations of corruption-related laws or regulations <sup>1</sup>        |  |
| Fines paid/payable for violations of corruption-related laws or regulations <sup>1</sup> |  |

(1) One affirmative response only.

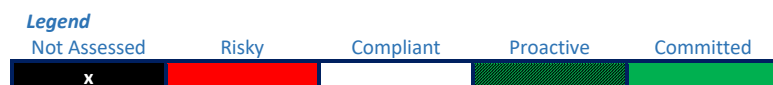

Supplement: s1 [file s1]
