# Supplementary material
Source: MDPI journal article supplement (https://www.mdpi.com/2071-1050/10/5/1601)
Supplement: s1 [file s1]

## Supplementary Information C: Life Cycle Inventory Results

STAKEHOLDER: WORKER

### Subcategory – Freedom of Association and Collective Bargaining Rights

**TABLE S18. LIFE CYCLE INVENTORY DATA REGARDING "FREEDOM OF ASSOCIATION AND COLLECTIVE BARGAINING RIGHTS" FOR WORKERS IN CANADIAN LAYER EGG FACILITIES IN 2012.**

|                                                                                                                                                            | Weighted<br>Average | Low | High |
|------------------------------------------------------------------------------------------------------------------------------------------------------------|---------------------|-----|------|
| (1) Is employment in your organization conditioned by any restrictions on the right of employees to collective bargaining? (%)                             | 0.00                |     |      |
| (2) What percentage of your employees is union represented? (%)                                                                                            | 0.00                |     |      |
| (3) Are your employees free to join unions of their choosing? (%)                                                                                          | 28.14               |     |      |
| (4) Are employee/union representatives invited to contribute to planning of larger changes in your organization, which will affect working conditions? (%) | 14.45               |     |      |
| (5) Do you have a codified minimum notice period(s) regarding significant operational changes? (%)                                                         | 6.66                |     |      |
| (6) If yes for (5), is it specified in a collective agreement? (%)                                                                                         | 0.42                |     |      |
| (7) Do your employees have access to a neutral, binding, and independent dispute resolution procedure? (%)                                                 | 10.23               |     |      |

### Subcategory – Fair Salary

**TABLE S19. LIFE CYCLE INVENTORY DATA REGARDING "FAIR SALARY" FOR WORKERS IN CANADIAN LAYER EGG FACILITIES IN 2012.**

|                                                                                                                 | Weighted<br>Average | Low     | High    |
|-----------------------------------------------------------------------------------------------------------------|---------------------|---------|---------|
| (1) What is the legally mandated minimum wage in your jurisdiction?                                             | \$10.11             | \$9.25  | \$10.25 |
| (2) What is the hourly wage of your lowest paid employee?                                                       | \$12.76             | \$10.00 | \$27.00 |
| (3) What % of your employees earn a wage that is at least 10% greater than the legally mandated minimum wage?   | %77.23              | %0      | %100    |
| (4) What % of your employees earn a wage that is at least 50% greater than the legally mandated minimum wage?   | %40.57              | %0      | %100    |
| (5) What % of your employees earn a wage that is more than 100% greater than the legally mandated minimum wage? | %26.94              | %0      | %100    |

|                                                                                                                                                    |        |
|----------------------------------------------------------------------------------------------------------------------------------------------------|--------|
| (6) Do you make regular and documented payments (i.e. pay slips) to your employees (i.e. weekly, bi-weekly or monthly)?                            | 57.15% |
| (7) How many complaints did your organization receive from employees with respect to deductions on wages (other than legally required deductions)? | 0%     |

### Subcategory – Working Hours

TABLE S20. LIFE CYCLE INVENTORY DATA REGARDING "WORKING HOURS" FOR WORKERS IN CANADIAN LAYER EGG FACILITIES IN 2012.

|                                                                                                                                                | Weighted Average | Low  | High    |
|------------------------------------------------------------------------------------------------------------------------------------------------|------------------|------|---------|
| (1) What is the average work week for your employees (hours)?                                                                                  | 38.83            | 7.00 | 126.30  |
| (2) What is the longest average work week for any of your employees (hours)?                                                                   | 46.76            | 7.00 | 126.30  |
| (3) What % of your employees work, on average, more than 48 hours per week?                                                                    | 11.09            | 0.00 | 100.00  |
| (4) With what % of your employees do you have a contractual agreement regarding working hours, overtime conditions, and overtime compensation? | 23.14            | 0.00 | 100.00  |
| (5) What % above regular hourly wages do you pay your employees for overtime?                                                                  | 5.77             | 0.00 | 50.00   |
| (6) On average, how many overtime hours were logged by your employees in 2012?                                                                 | 33.00            | 0.00 | 1000.00 |
| (7) What were the total overtime hours logged by employees in 2012?                                                                            | 68.12            | 0.00 | 1000.00 |

### Subcategory – Equal Opportunities

TABLE S21. LIFE CYCLE INVENTORY DATA REGARDING "EQUAL OPPORTUNITIES" FOR WORKERS IN CANADIAN LAYER EGG FACILITIES IN 2012.

|                                                                         | Weighted Average | Low | High |
|-------------------------------------------------------------------------|------------------|-----|------|
| (1) Does your organization have a formal policy on equal opportunities? | 28.00            |     |      |
| (2) What % of your employees are female?                                | 37.38            | 0   | 100  |
| (3) What % of your employees belong to a visible minority?              | 2.60             | 0   | 60   |
| (4) What % of your management positions are occupied by females?        | 26.63            | 0   | 100  |

|                                                                                                                 |       |      |     |
|-----------------------------------------------------------------------------------------------------------------|-------|------|-----|
| (5) What % of your management positions are occupied by persons belonging to a visible minority?                | 0.24  | 0    | 50  |
| (6) What % of your employees are aged < 30?                                                                     | 37.44 | 0    | 100 |
| (7) What % of your employees are aged 30-50?                                                                    | 35.03 | 0    | 100 |
| (8) What % of your employees are aged >50?                                                                      | 29.13 | 0    | 100 |
| (9) How many complaints of discrimination or harassment were filed within or against your organization in 2012? | 0     |      |     |
| (10) What is the ratio of the basic salary of women to men for workers in your organization?                    | 1:1   |      |     |
| (11) What is the ratio of the basic salary of women to men for managers in your organization?                   | 0.85  | 0.33 | 1   |

### Subcategory – Health and Safety

**TABLE S22. LIFE CYCLE INVENTORY DATA REGARDING "HEALTH AND SAFETY" FOR WORKERS IN CANADIAN LAYER EGG FACILITIES IN 2012.**

|                                                                                                         | Weighted<br>Average | Low  | High      |
|---------------------------------------------------------------------------------------------------------|---------------------|------|-----------|
| (1) What were the total expenditures related to health and safety measures in your organization (\$)?   | 1,762.41            | 0.33 | 21,080.00 |
| (2) How many work days were lost due to occupational accidents, injuries and illness?                   | 2.70                | 0.33 | 60.00     |
| (3) How many WCB claims were filed by employees?                                                        | 0.14                | 0.00 | 1.00      |
| (4) How many medically-diagnosed, work-related diseases were reported?                                  | 0.00                |      |           |
| (5) How many work-related fatalities occurred?                                                          | 0.00                |      |           |
| (6) Does your organization have a dedicated Health and Safety plan (%)?                                 | 45.00               |      |           |
| (7) Does your organization have a dedicated Health and Safety manager (%)?                              | 31.00               |      |           |
| (8) How many hours in total were dedicated to health and safety training?                               | 18.00               | 0.00 | 104.00    |
| (9) Is your workplace characterized by high levels of noise, fumes, dust, heat, or other irritants (%)? | 53.00               |      |           |
| (10) Are your employees required to handle hazardous materials (%)?                                     | 50.00               |      |           |
| (11) Are your employees trained in handling hazardous materials (%)?                                    | 53.00               |      |           |
| (12) Are employees provided with appropriate protective gear (%)?                                       | 100.00              |      |           |
| (13) Is first aid equipment maintained and available to all employees when required (%)?                | 82.00               |      |           |

|                                                                                     |        |
|-------------------------------------------------------------------------------------|--------|
| (14) Is there a trained, designated first aid attendant in your workplace (%)?      | 62.00  |
| (15) Do your employees have access to clean drinking water and sanitary facilities? | 100.00 |

### Subcategory – Social Benefits, Social Security, and Job Security

**TABLE S23. LIFE CYCLE INVENTORY DATA REGARDING "SOCIAL BENEFITS, SOCIAL SECURITY, AND JOB SECURITY" FOR WORKERS IN CANADIAN LAYER EGG FACILITIES IN 2012.**

|                                                                                             | Weighted<br>Average | Low  | High      |
|---------------------------------------------------------------------------------------------|---------------------|------|-----------|
| (1) For what % of employees does your organization provide health insurance?                | 49.00               | 0.00 | 100.00    |
| (2) For what % of employees does your organization provide dental insurance?                | 37.00               | 0.00 | 100.00    |
| (3) For what % of employees does your organization provide child care benefits?             | 14.00               | 0.00 | 100.00    |
| (4) For what % of employees does your organization provide retirement benefits?             | 36.00               | 0.00 | 100.00    |
| (5) For what % of employees does your organization provide maternity or paternity benefits? | 13.00               | 0.00 | 100.00    |
| (6) What % of your employees have employment contracts held by other organizations?         | 0.10                | 0.00 | 25.00     |
| (7) What % of your employees have formal employment contracts?                              | 24.40               | 0.00 | 100.00    |
| (8) What % of your employees have full-time employment contracts?                           | 16.30               | 0.00 | 100.00    |
| (9) What % of your employees have part-time employment contracts?                           | 9.60                | 0.00 | 75.00     |
| (10) What % of your workers declare as "self-employed"?                                     | 6.50                | 0.00 | 100.00    |
| (11) What % of your employees do not have an employment contract?                           | 66.30               | 0.00 | 100.00    |
| (12) What was your % employee turnover rate?                                                | 4.10                | 0.00 | 50.00     |
| (13) What % of employees who left were dismissed?                                           | 23.20               | 0.00 | 50.00     |
| (14) What % of employees who left were retiring?                                            | 0.00                | 0.00 | 0.00      |
| (15) What % of employees left due to restructuring?                                         | 2.70                | 0.00 | 33.00     |
| (16) What % of employees who left quit?                                                     | 54.40               | 0.00 | 100.00    |
| (17) What was the total amount paid by your organization for health insurance?              | 1,835.09            | 0.00 | 14,760.00 |
| (18) What was the total amount paid by your organization for dental insurance?              | 393.75              | 0.00 | 8,333.00  |

|                                                                                               |          |      |           |
|-----------------------------------------------------------------------------------------------|----------|------|-----------|
| (19) What was the total amount paid by your organization for child care benefits?             | 0.00     | 0.00 | 0.00      |
| (20) What was the total amount paid by your organization for retirement benefits?             | 2,819.14 | 0.00 | 85,525.00 |
| (21) What was the total amount paid by your organization for maternity or paternity benefits? | 7.31     | 0.00 | 939.12    |

## STAKEHOLDER: LOCAL COMMUNITY

### Subcategory – Access to Resources

TABLE S24. LIFE CYCLE INVENTORY DATA REGARDING "ACCESS TO RESOURCES" FOR LOCAL COMMUNITIES HOSTING CANADIAN LAYER EGG FACILITIES IN 2012.

|                                                                                                                                                   | Weighted Average | Low  | High      |
|---------------------------------------------------------------------------------------------------------------------------------------------------|------------------|------|-----------|
| (1) What were the total expenditures of your organization on infrastructure with mutual community access and benefit? (\$)                        | 0.42             | 0.00 | 100.00    |
| (2) What were the total expenditures of your organization related to voluntary, charitable donations and investments in the local community? (\$) | 2,205.33         | 0.00 | 26,000.00 |

### Subcategory – Safe and Healthy Living Conditions

TABLE S25. LIFE CYCLE INVENTORY DATA REGARDING "SAFE AND HEALTHY LIVING CONDITIONS" FOR LOCAL COMMUNITIES HOSTING CANADIAN LAYER EGG FACILITIES IN 2012.

|                                                                                                                                                         | Weighted Average | Low  | High |
|---------------------------------------------------------------------------------------------------------------------------------------------------------|------------------|------|------|
| (1) How many accidents occurred in the local community as a result of organization activities?                                                          | 0.01             | 0.00 | 1.00 |
| (2) How many complaints did the organization receive from the local community with respect to noise, fumes, dust, wastewater, or other nuisance issues? | 0.40             | 0.00 | 2.00 |

|                                                                                                                                                  |       |          |      |
|--------------------------------------------------------------------------------------------------------------------------------------------------|-------|----------|------|
| (3) Does the organization have a formal protocol in place to maintain and improve safe and healthy living conditions in the local community? (%) | 27.00 |          |      |
| (4) Does the organization have a formal protocol in place to minimize risks to the local community?                                              | 32.00 |          |      |
| (5) Does the organization have a formal protocol in place for responding to grievances from the local community?                                 | 17.00 |          |      |
| (6) How many fines were issued against the organization as a result of infringements at the local community level?                               | 0.00  | 0.0<br>0 | 0.00 |
| (7) What was the total value of fines issued against the organization as a result of infringements at the local community level?                 | 0.00  | 0.0<br>0 | 0.00 |
| (8) Does the organization have an environmental farm management plan? (%)                                                                        | 65.00 |          |      |

### Subcategory – Respect for Indigenous Rights

TABLE S26. LIFE CYCLE INVENTORY DATA REGARDING "RESPECT FOR INDIGENOUS RIGHTS" FOR LOCAL COMMUNITIES HOSTING CANADIAN LAYER EGG FACILITIES IN 2012.

|                                                                                                                           | Weighted<br>Average | Low  | High |
|---------------------------------------------------------------------------------------------------------------------------|---------------------|------|------|
| (1) Does your organization operate in a region where there is land rights conflict with indigenous groups? (%)            | 2.00                |      |      |
| (2) Does your organization have a formal policy in place to protect the rights of indigenous community members? (%)       | 2.00                |      |      |
| (3) How many meetings were held with indigenous community members?                                                        | 0.00                | 0.00 | 0.00 |
| (4) How many complaints did the organization receive with respect to discrimination against indigenous community members? | 0.00                | 0.00 | 0.00 |

## Subcategory – Community Engagement

TABLE S27. LIFE CYCLE INVENTORY DATA REGARDING "COMMUNITY ENGAGEMENT" FOR LOCAL COMMUNITIES HOSTING CANADIAN LAYER EGG FACILITIES IN 2012.

|                                                                                    | Weighted<br>Average | Low  | High |
|------------------------------------------------------------------------------------|---------------------|------|------|
| (1) Does your organization have a formal policy on community engagement? (%)       | 7.00                |      |      |
| (2) How many community stakeholder groups did the organization engage with?        | 0.51                | 0.00 | 6.00 |
| (3) How many meetings did the organization attend with community stakeholders      | 0.10                | 0.00 | 6.00 |
| (4) How many volunteer hours did the organization devote to community initiatives? | 8.87                | 0.00 | 242  |

## Subcategory – Local Employment

TABLE 2. LIFE CYCLE INVENTORY DATA REGARDING "LOCAL EMPLOYMENT" FOR LOCAL COMMUNITIES HOSTING CANADIAN LAYER EGG FACILITIES IN 2012.

|                                                                                   | Weighted<br>Average | Low  | High   |
|-----------------------------------------------------------------------------------|---------------------|------|--------|
| (1) What % of your employees was hired from the local community?                  | 87.00               | 0.00 | 100.00 |
| (2) Does your organization have a formal hiring policy that favours local hiring? | 29.00               |      |        |
| (3) What % of your purchase expenditures went to local goods/services providers?  | 64.00               | 0.00 | 100.00 |

## STAKEHOLDER: VALUE CHAIN PARTNERS

### Subcategory – Fair Competition

TABLE S29. LIFE CYCLE INVENTORY DATA REGARDING "FAIR COMPETITION" FOR THE SUPPLY CHAIN PARTNERS OF CANADIAN LAYER EGG FACILITIES IN 2012.

|                                                                                                                                                                                                                                  | Weighted<br>Average | Low  | High |
|----------------------------------------------------------------------------------------------------------------------------------------------------------------------------------------------------------------------------------|---------------------|------|------|
| (1) Does your organization have a document stating procedures to prevent engaging in or being complicit in anti-competitive behaviours?                                                                                          | 0.00                |      |      |
| (2) How many legal actions are pending or were completed regarding anti-competitive behavior and violations of anti-trust and monopoly legislation in which your organization has been identified as a participant?              | 0.00                | 0.00 | 0.00 |
| (3) What was the total amount of fines paid/payable for infringements regarding anti-competitive behavior and violations of anti-trust and monopoly legislation in which your organization has been identified as a participant? | 0.00                | 0.00 | 0.00 |
| (4) How many complaints did your organization receive concerning anti-competitive behaviours?                                                                                                                                    | 0.00                | 0.00 | 0.00 |

### Subcategory – Promoting Social Responsibility

TABLE S30. LIFE CYCLE INVENTORY DATA REGARDING "PROMOTING SOCIAL RESPONSIBILITY" FOR THE SUPPLY CHAIN PARTNERS OF CANADIAN LAYER EGG FACILITIES IN 2012.

|                                                                                                                                                 | Weighted<br>Average | Low  | High |
|-------------------------------------------------------------------------------------------------------------------------------------------------|---------------------|------|------|
| (1) Does your organization adhere to a specific code of conduct regarding the protection of human rights among suppliers? (%)                   | 3.00                |      |      |
| (2) How many suppliers did you audit with regards to environmental or social responsibility?                                                    | 0.00                | 0.00 | 0.00 |
| (3) In how many initiatives does your organization have memberships that promote environmental or social responsibility along the supply chain? | 0.16                | 0.00 | 5.00 |



## Subcategory – Supplier Relationships

TABLE S31. LIFE CYCLE INVENTORY DATA REGARDING "SUPPLIER RELATIONSHIPS" FOR THE SUPPLY CHAIN PARTNERS OF CANADIAN LAYER EGG FACILITIES IN 2012.

|                                                                                                              | Weighted<br>Average | Low  | High |
|--------------------------------------------------------------------------------------------------------------|---------------------|------|------|
| (1) How many complaints did your organization receive from suppliers with respect to coercive communication? | 0.00                | 0.00 | 0.00 |
| (2) How many complaints did your organization receive from suppliers with respect to insufficient lead time? | 0.00                | 0.00 | 0.00 |
| (3) How many complaints did your organization receive from suppliers with respect to timeliness of payments? | 0.01                | 0.00 | 2.00 |

STAKEHOLDER: SOCIETY

## Subcategory – Public Commitment to Sustainability

TABLE S32. LIFE CYCLE INVENTORY DATA REGARDING "PUBLIC COMMITMENT TO SUSTAINABILITY" FOR SOCIETY AT LARGE WITH RESPECT TO CANADIAN LAYER EGG FACILITIES IN 2012.

|                                                                                                                                                | Weighted<br>Average | Low  | High      |
|------------------------------------------------------------------------------------------------------------------------------------------------|---------------------|------|-----------|
| (1) Did your organization produce publicly available documents (for example, CSR), that communicate your commitments to sustainability issues? | 8.00                |      |           |
| (2) Does your organization have specific mechanisms to ensure the realization of your public sustainability commitments?                       | 1.00                |      |           |
| (3) How many complaints did you receive related to non-fulfillment of promises or agreements?                                                  | 0.00                | 0.00 | 0.00      |
| (4) How many awards did your organization receive for engagement in social, environmental, or sustainability issues?                           | 0.24                | 0.00 | 4.00      |
| (5) How many memberships does your organization have in programmes to support and promote sustainable business practices?                      | 0.30                | 0.00 | 5.00      |
| (6) What were your total hours devoted to sustainability programmes?                                                                           | 10.12               | 0.00 | 150.00    |
| (7) What were your total expenditures devoted to sustainability programmes?                                                                    | 802.98              | 0.00 | 10,000.00 |

|                                                                                               |      |      |      |
|-----------------------------------------------------------------------------------------------|------|------|------|
| (8) How many times was your organization accused of lobbying against sustainability measures? | 0.00 | 0.00 | 0.00 |
|-----------------------------------------------------------------------------------------------|------|------|------|

### Subcategory – Contribution to Economic Development

TABLE S33. LIFE CYCLE INVENTORY DATA REGARDING "CONTRIBUTION TO ECONOMIC DEVELOPMENT" FOR SOCIETY AT LARGE WITH RESPECT TO CANADIAN LAYER EGG FACILITIES IN 2012.

|                                                                                         |              |            |              |
|-----------------------------------------------------------------------------------------|--------------|------------|--------------|
| (1) What was the total revenue for your organization in 2012?                           | 2,507,837.95 | 260000.00  | 9,463,885.00 |
| (2) What were the total wages paid by your organization in 2012?                        | 247,846.73   | 373.00     | 1,055,438.00 |
| (3) What were the total payments to government (taxes, royalties, permits, fees, etc.)? | 78,382.30    | 500.00     | 339,569.00   |
| (4) What were the total expenses paid by your organization?                             | 1,758,493.30 | 175,000.00 | 7,226,757.00 |

### Subcategory – Employee Training

TABLE S34. LIFE CYCLE INVENTORY DATA REGARDING "EMPLOYEE TRAINING" FOR SOCIETY AT LARGE WITH RESPECT TO CANADIAN LAYER EGG FACILITIES IN 2012.

|                                                                      | Weighted<br>Average | Low  | High     |
|----------------------------------------------------------------------|---------------------|------|----------|
| (1) What were the total hours devoted to employee training?          | 52.82               | 0.00 | 500.00   |
| (2) What were your total expenses related to employee training? (\$) | 529.02              | 0.00 | 6,000.00 |

## Subcategory – Corruption

TABLE S35. LIFE CYCLE INVENTORY DATA REGARDING "CORRUPTION" FOR SOCIETY AT LARGE WITH RESPECT TO CANADIAN LAYER EGG FACILITIES IN 2012.

|                                                                                                                    | Weighted<br>Average | Low  | High   |
|--------------------------------------------------------------------------------------------------------------------|---------------------|------|--------|
| (1) How many convictions did your organization receive for violations of corruption-related laws or regulations?   | 0.02                | 0.00 | 2.00   |
| (2) What was the total amount of fines paid/payable for violations of corruption-related laws or regulations? (\$) | 4.13 <sup>1</sup>   | 0.00 | 500.00 |

(1) One affirmative response only.
